# Supplementary material
Source: Springer Nature journal article supplement (https://springermedizin.de/resource/supplementary/12908_2011_128_MOESM2_ESM.pdf/9525200)
Supplement: MOESM2 [file 9525200]

## Activities by clinical pharmacists

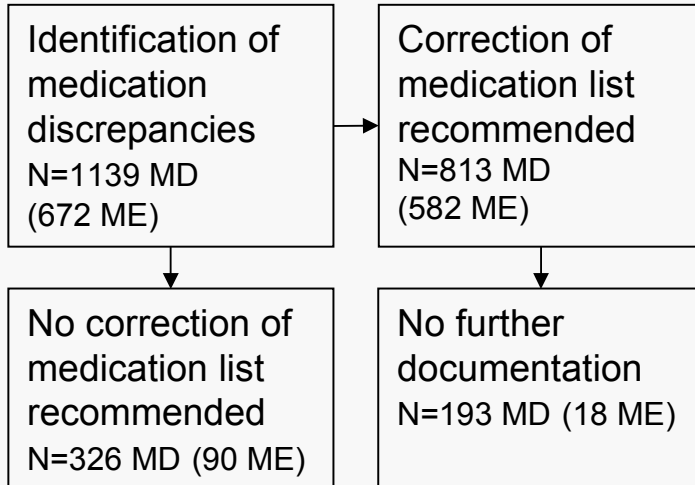

## Activities by physicians

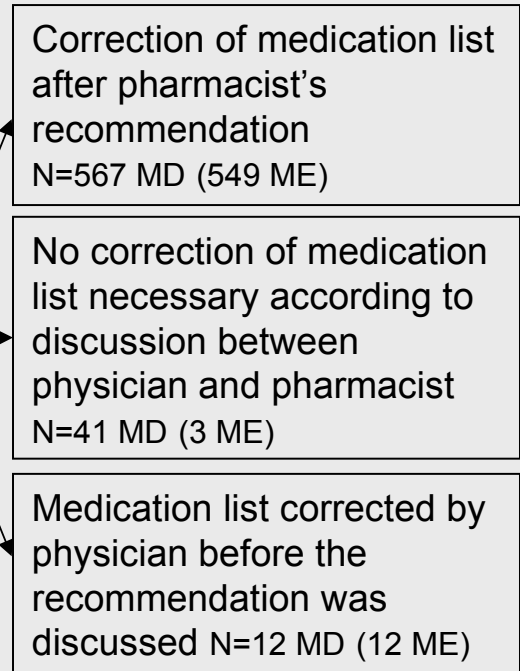

## Reasons for not recommending correction

- No correction of medication list necessary according to pharmacist N=78 MD (6 ME)
- Medication list corrected by physician before the recommendation was discussed N=68 MD (66 ME)
- Reason not documented N=180 MD (18 ME)
